# Supplementary material for: Spatial assessment of probable recharge areas – Investigating the hydrogeological controls of an active deep-seated gravitational slope deformation
Source: Copernicus journal article supplement (doi:10.5194/nhess-2021-388), 2021-12-21
Supplement: Supplementary file [file nhess-2021-388-AC2-supplement.pdf]

## **Response to the Reviewers' comments**

(original comment in italics and response in green)

### **Review #2 (Anonymous)**

<https://doi.org/10.5194/nhess-2021-388-RC2>, 2022

*The article describes interesting and possibly applicable method to evaluate hydrogeological conditions governing deep seated gravitational slope deformations. I found no major drawback of the presented article, while I think the method can be quite useful even for practical landslide mitigation purposes.*

**We thank the reviewer for the positive feedback.**
